# Supplementary figures and images for: Estimating errors in vehicle secondary aerosol production factors due to oxidation flow reactor response time
Source: Copernicus journal article supplement (doi:10.5194/egusphere-2023-2692), 2023-12-21

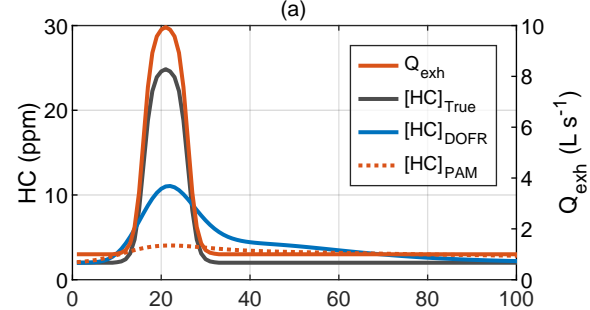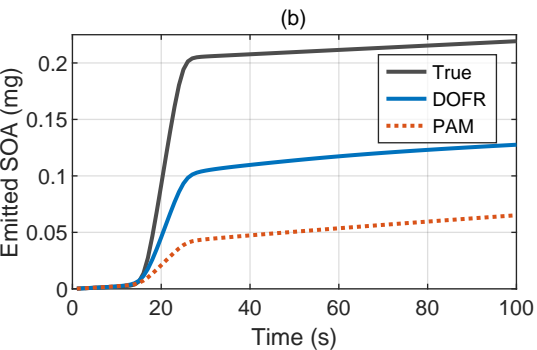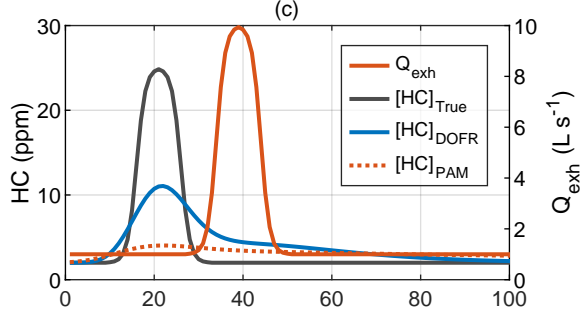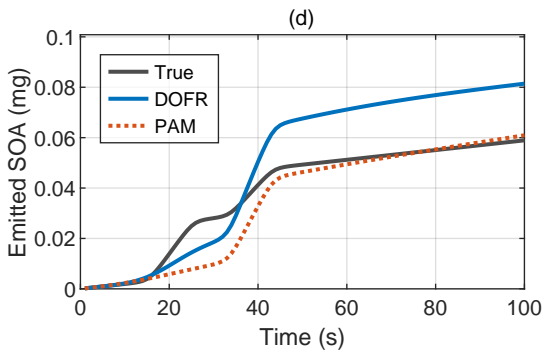

Supplement: Supplementary file 1 [file egusphere-2023-2692-supplement.zip]

DOFR; Cold-start NEDC

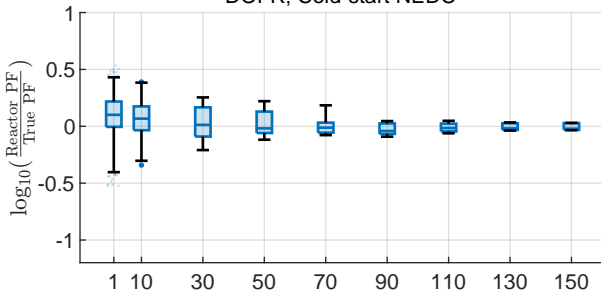

PAM; Cold-start NEDC

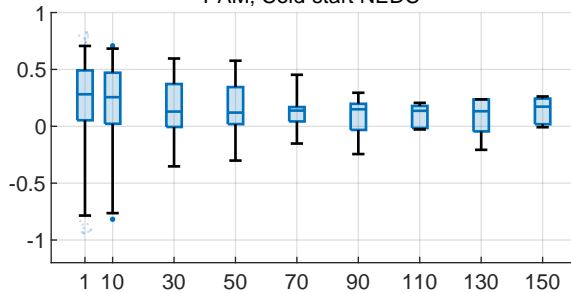

DOFR; Hot-start NEDC

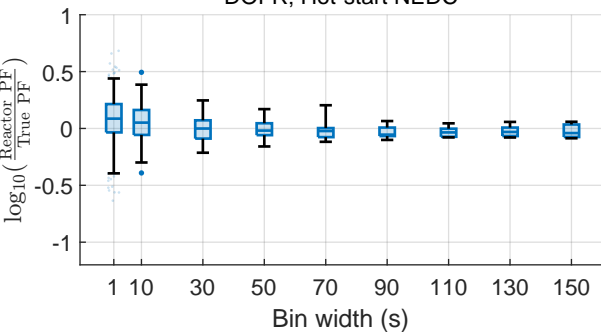

PAM; Hot-start NEDC

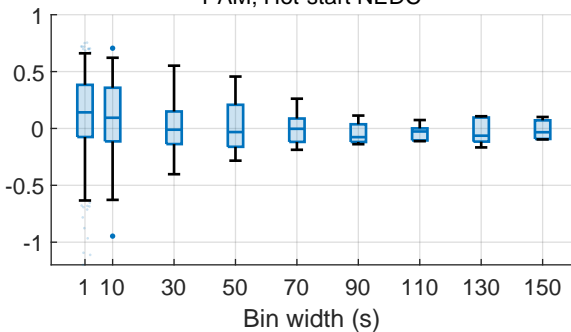

Supplement: Supplementary file 2 [file egusphere-2023-2692-supplement.zip]

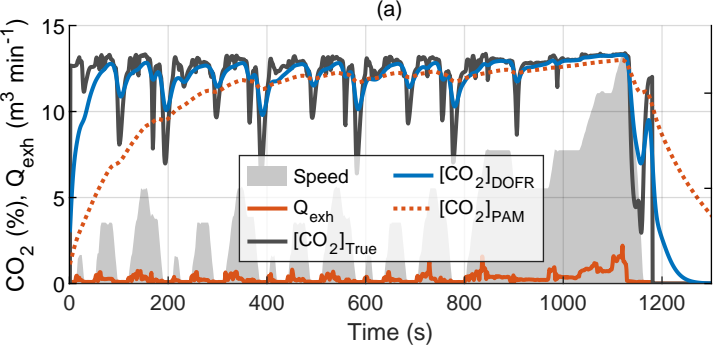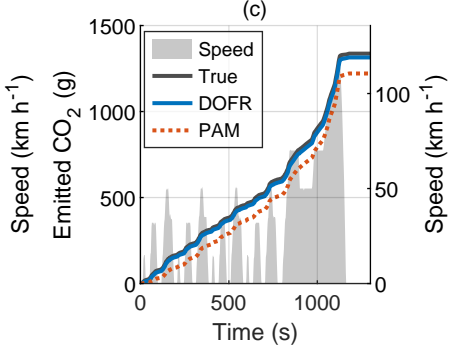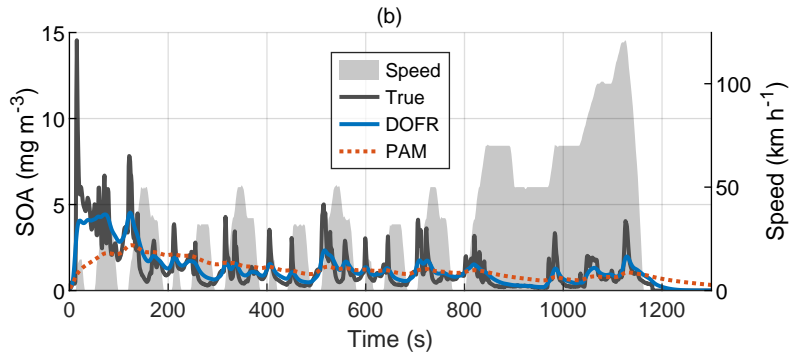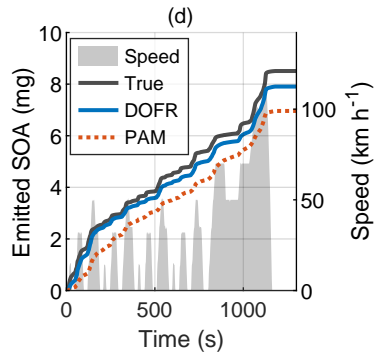

Supplement: Supplementary file 3 [file egusphere-2023-2692-supplement.zip]

DOFR

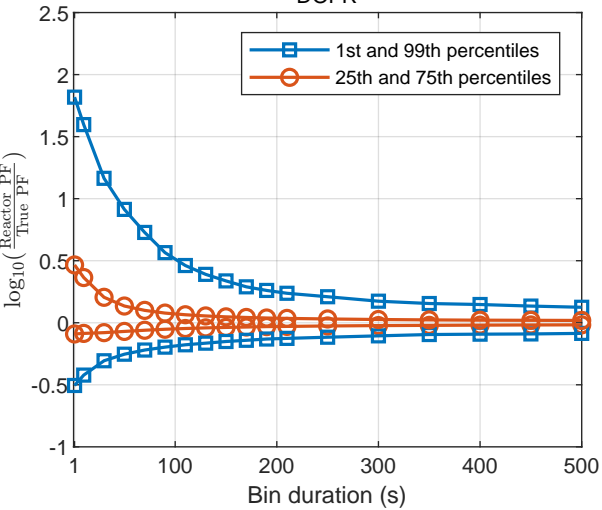

PAM

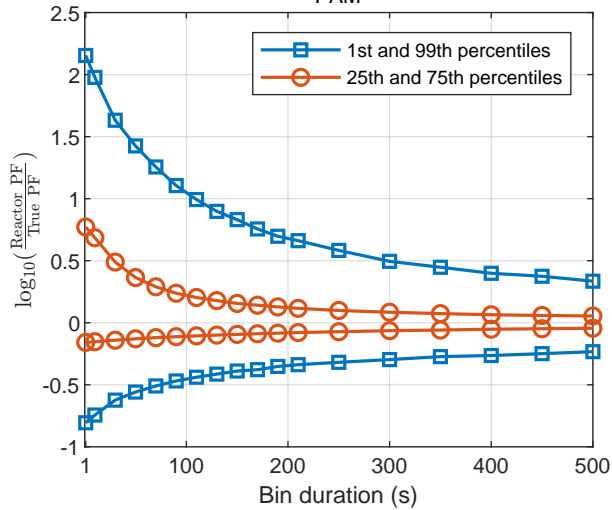

Supplement: Supplementary file 4 [file egusphere-2023-2692-supplement.zip]

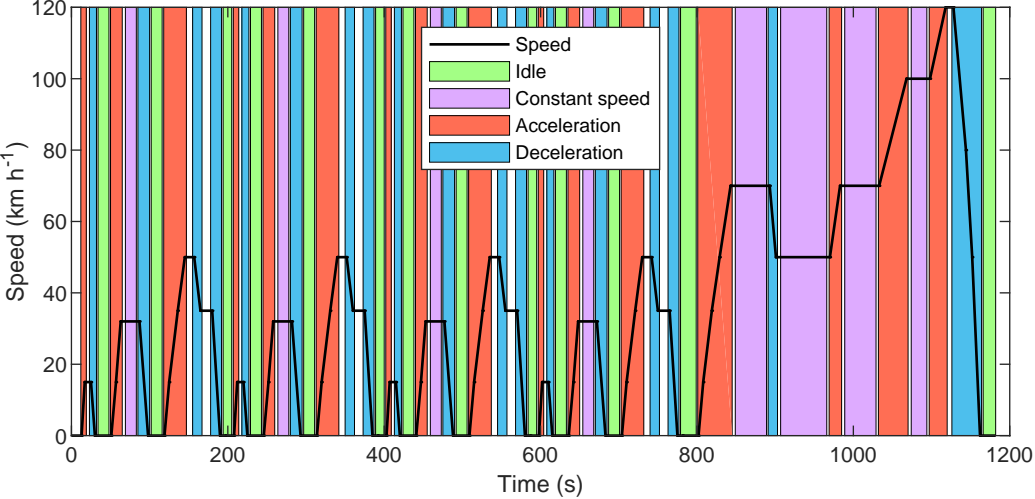

Supplement: Supplementary file 5 [file egusphere-2023-2692-supplement.zip]

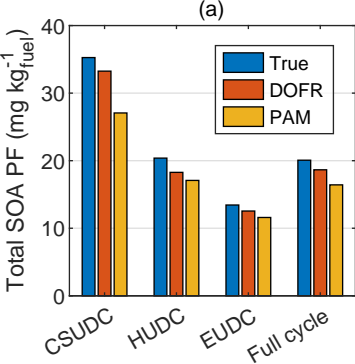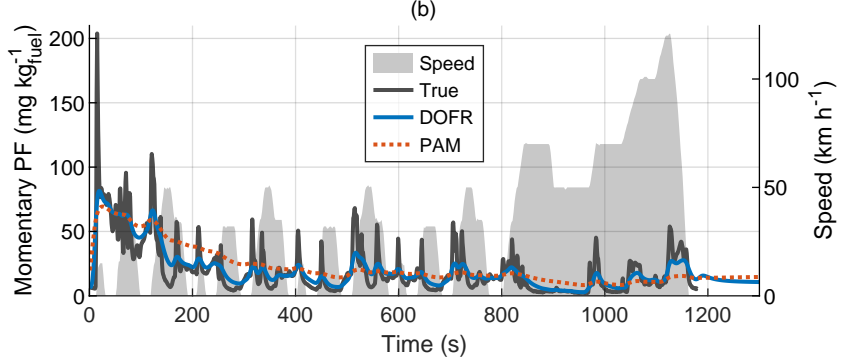

Supplement: Supplementary file 6 [file egusphere-2023-2692-supplement.zip]

(a) Hot-start NEDC

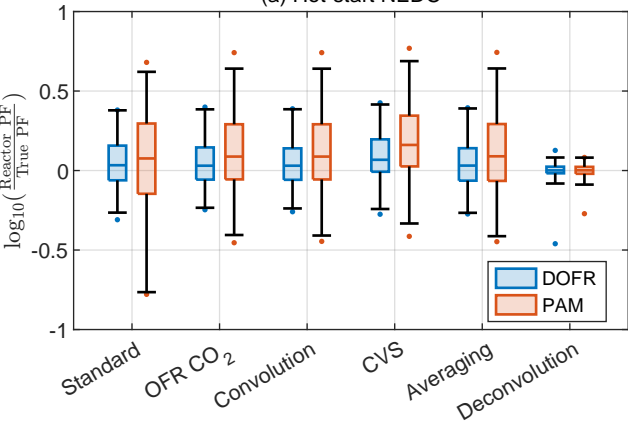

(b) Cold-start NEDC

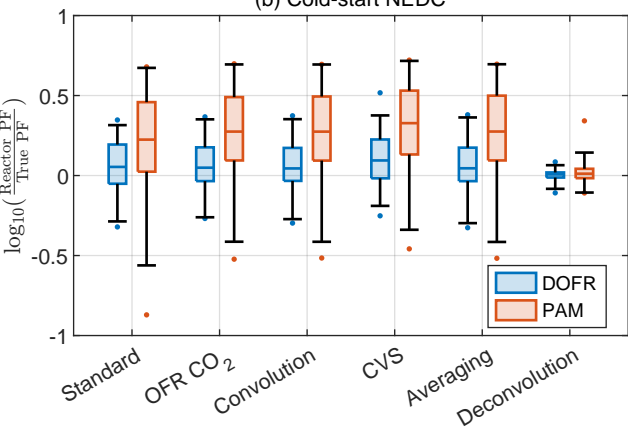

Supplement: Supplementary file 7 [file egusphere-2023-2692-supplement.zip]

DOFR; Cold-start NEDC

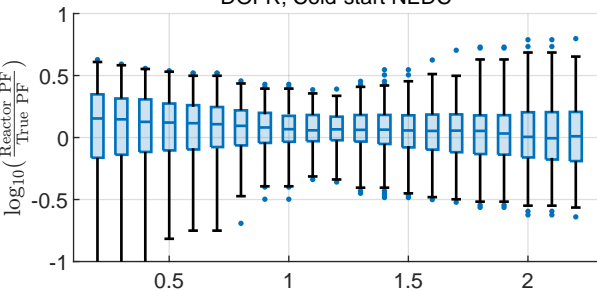

PAM; Cold-start NEDC

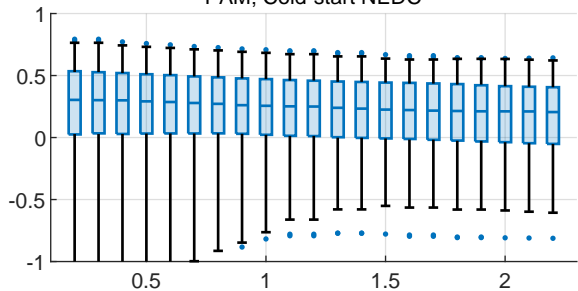

DOFR; Hot-start NEDC

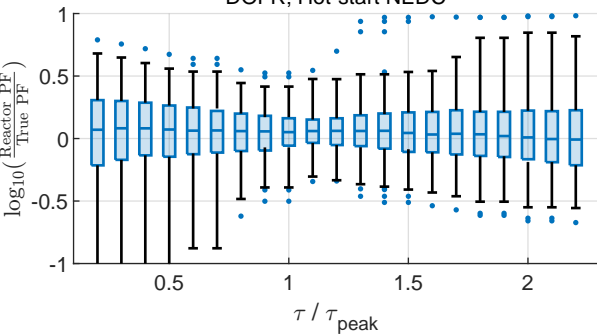

PAM; Hot-start NEDC

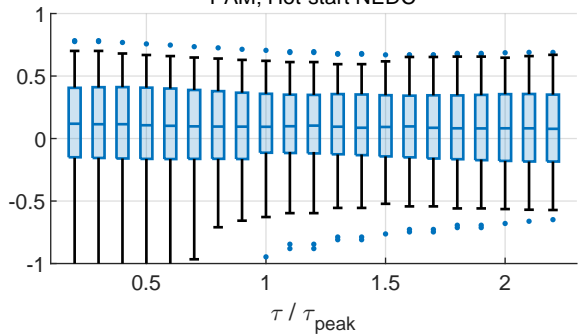

Supplement: Supplementary file 8 [file egusphere-2023-2692-supplement.zip]

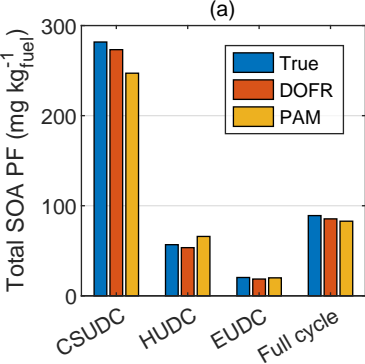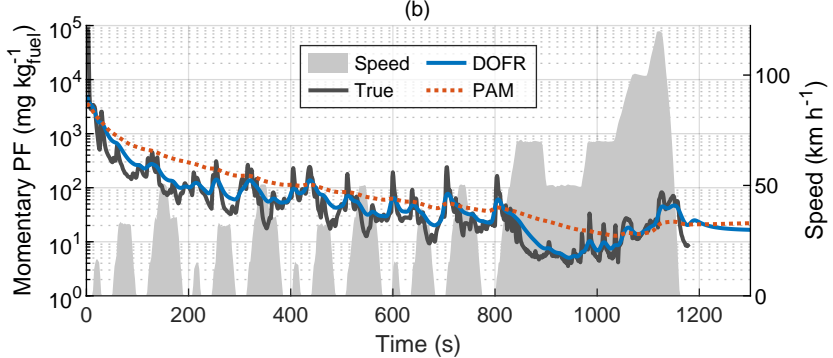

Supplement: Supplementary file 9 [file egusphere-2023-2692-supplement.zip]

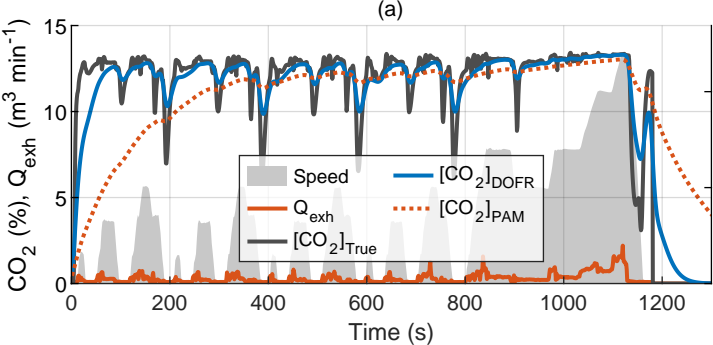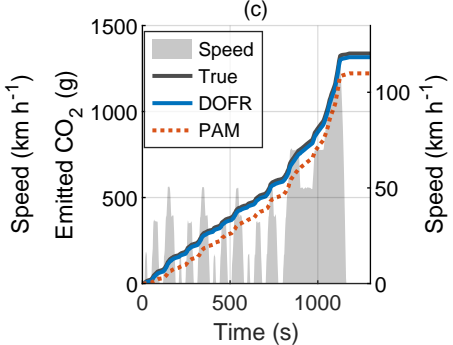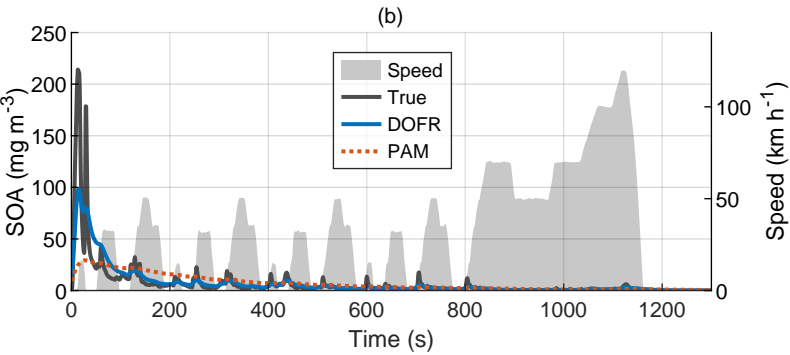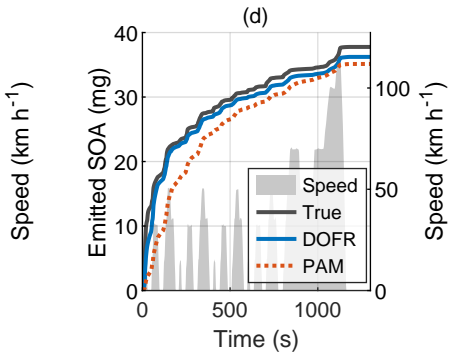

Supplement: Supplementary file 10 [file egusphere-2023-2692-supplement.zip]

(a) Cold-start NEDC

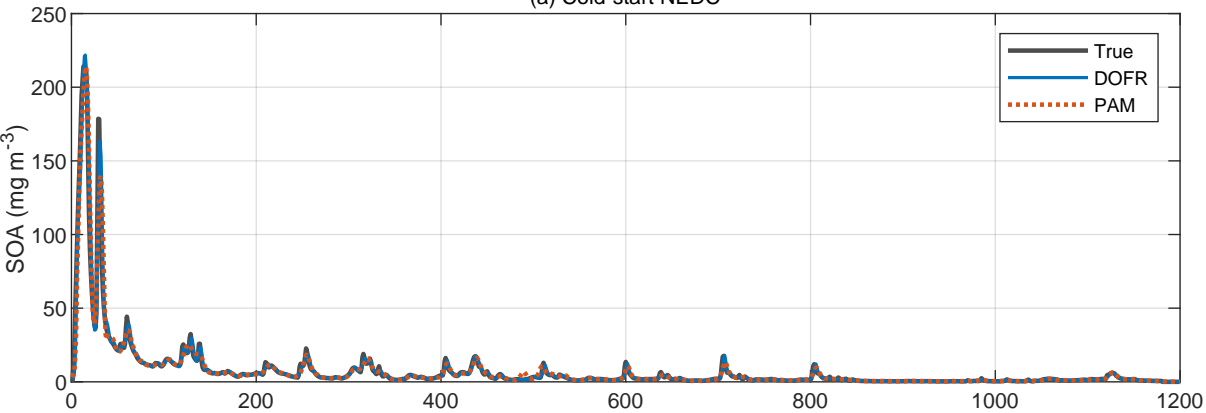

(b) Hot-start NEDC

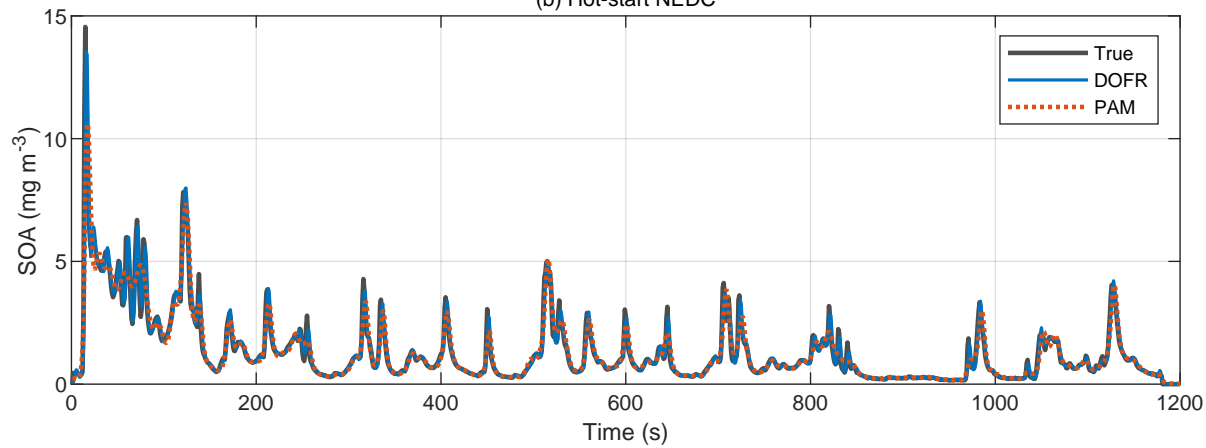

Supplement: Supplementary file 11 [file egusphere-2023-2692-supplement.zip]

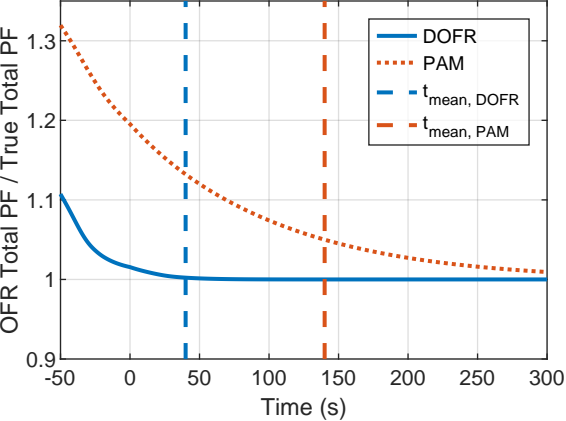

Supplement: Supplementary file 12 [file egusphere-2023-2692-supplement.zip]

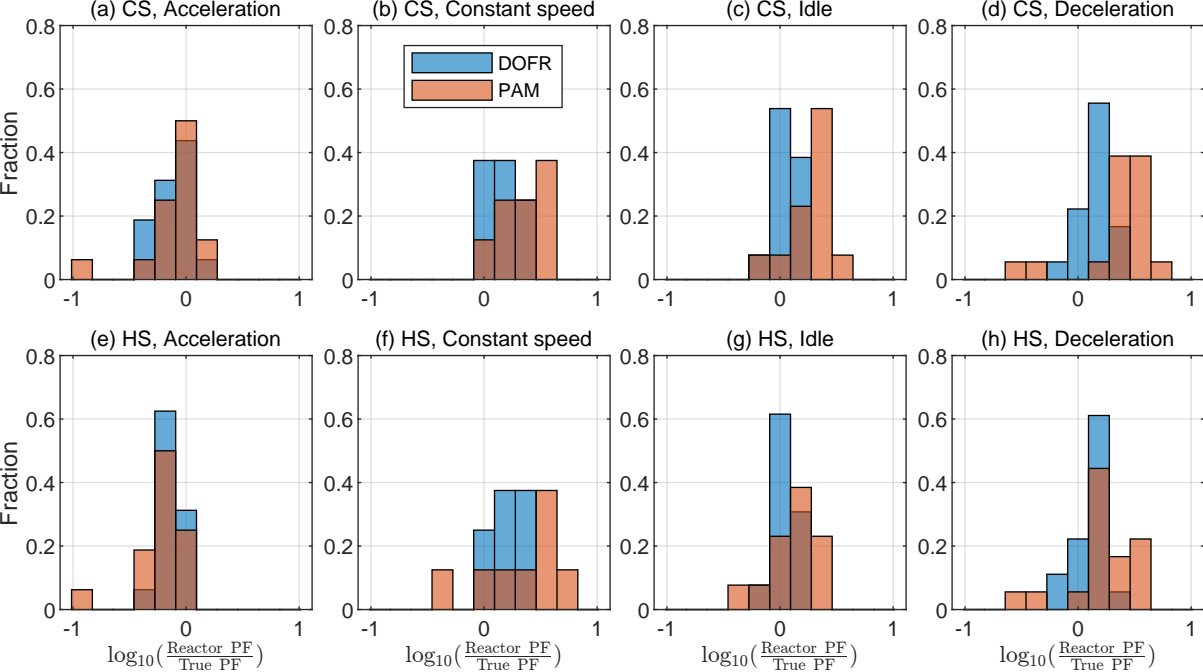

Supplement: Supplementary file 13 [file egusphere-2023-2692-supplement.zip]

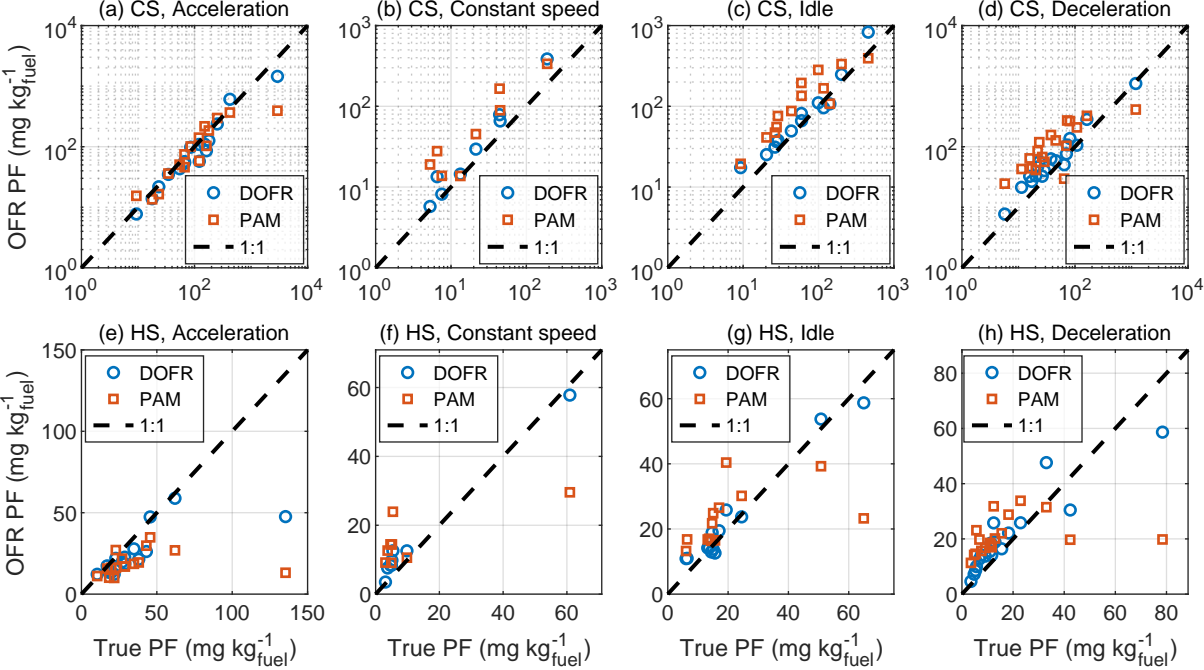

Supplement: Supplementary file 15 [file egusphere-2023-2692-supplement.zip]

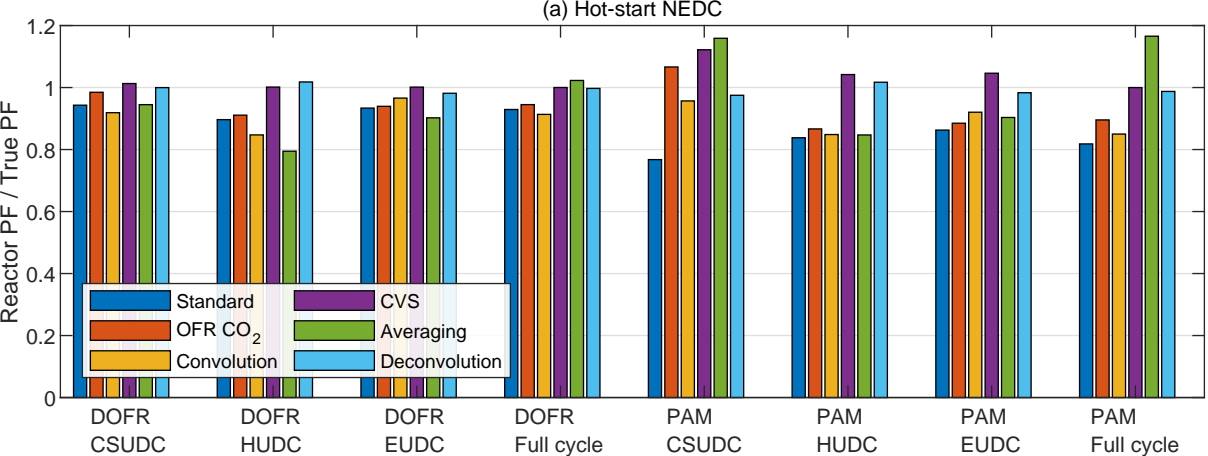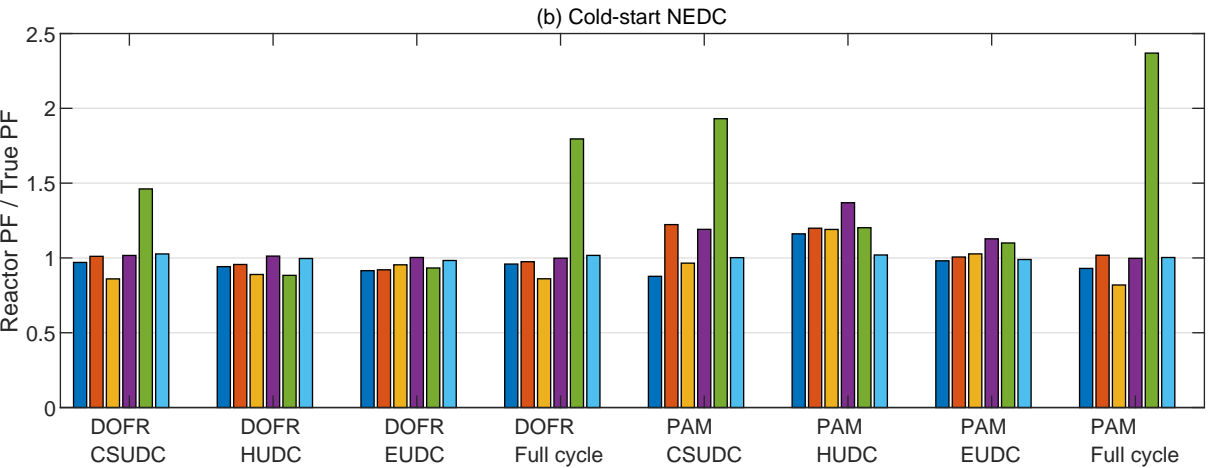

Supplement: Supplementary file 16 [file egusphere-2023-2692-supplement.zip]
